# Supplementary material for: Automatic Osteoporosis Screening System Using Radiomics and Deep Learning from Low-Dose Chest CT Images
Source: MDPI journal article supplement (doi:10.3390/bioengineering11010050), 2024-01-02
Supplement: s1 [file s1]

## SUPPLEMENTARY

### Supplementary S1. The BMD scanning protocol and measurement

All BMD examinations were performed with a standard protocol according to the manufacturer's instructions. The main scan parameters were 120 kV, smart mA (noise index: 10, 50-400mA), scanning field of view of 50 cm, and reconstruction thickness and interval of 1.25 mm. All images were transferred to a dedicated QCT post-processing workstation (Model 4 QCT pro v6.1, Mindways Software, Inc., Austin, USA) for BMD assessment. In addition, a QCT calibration phantom (Mindways Software Inc., Austin, TX, USA) was scanned once a week for accurate asynchronous BMD analysis.

For BMD assessment, the BMDs of L1-2 vertebrae were measured, and the average values were calculated. An oval volume of interest (VOI) was manually placed with a depth of 9 mm, which avoids cortical bone, vertebral venous plexus, and bone islands, covering approximately 2/3 of cancellous bone. According to the clinical diagnostic criteria of BMD assessment, osteoporosis was defined as an average BMD of L1-L2  $<80 \text{ mg/cm}^3$ , osteopenia as a range of  $80\text{-}120 \text{ mg/cm}^3$ , and normal BMD as  $>120 \text{ mg/cm}^3$ .

### Supplementary S2. The detailed settings of the coarse-scale segmentation network

The learning rate was  $1\text{e-}4$ , batch size was 8, the number of epochs was set to 1001, and the optimizer was Adam. We used the Focal loss function to monitor the convergence of the training model and optimize the network, a variant of the cross-entropy loss function that alleviates the impact of class imbalance on model training by adjusting sample weights.

### Supplementary S3. Radiomic features extraction methods

A step-wise feature selection strategy was used to determine the optimal features. which sequentially apply three feature selection methods: Recursive Feature Elimination (RFE), Minimum Redundancy Maximum Relevance (mRMR), and the Least Absolute Shrinkage and Selection Operator (LASSO). RFE iteratively eliminates the least relevant features based on their importance rankings. The mRMR reduces the mutual redundancy between features and retains the largest relevant features. LASSO is a regularization method that minimizes the loss function with a constraint on the L1 norm of the model parameters. By shrinking some feature weights to zero, LASSO achieves feature selection.

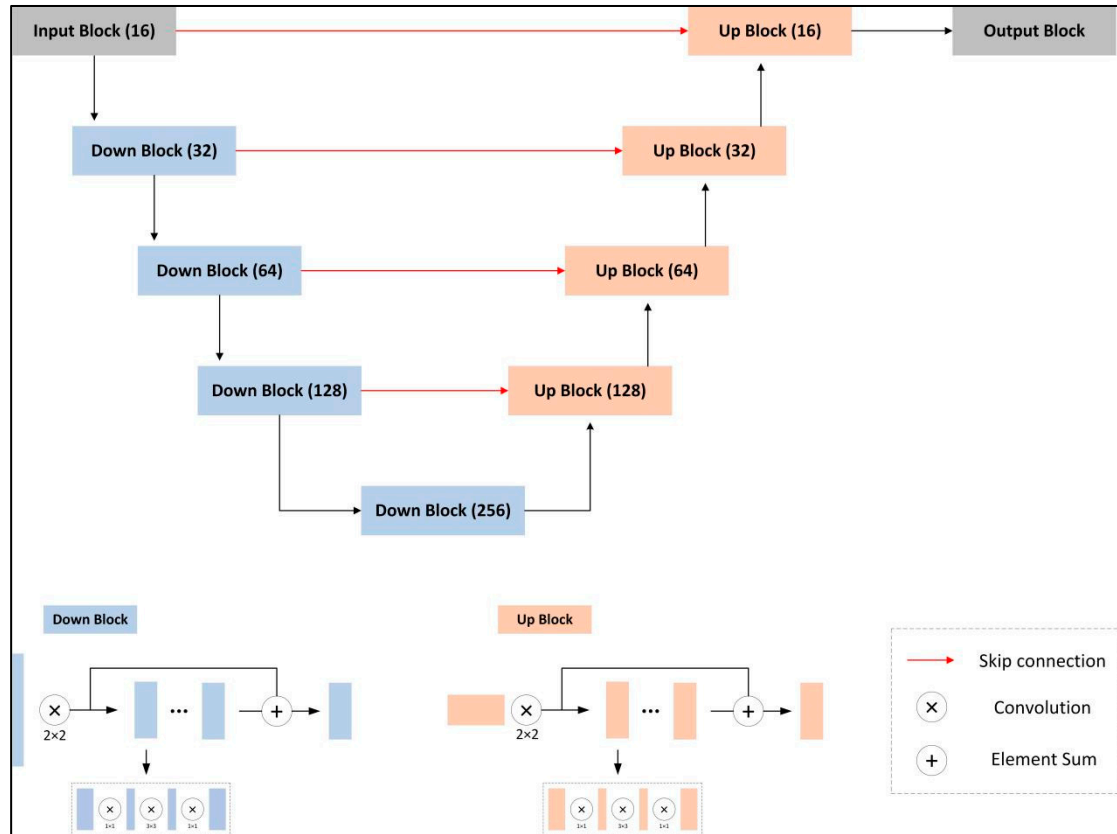

**Supplementary Figure S1. VB-Net architecture.** VB-Net is a variant segmentation network structure of V-Net that utilizes a bottle-neck structure (B stands for bottle-neck) instead of the convolution, normalization, and activation layers within the Down Block and Up block. A bottleneck structure in a neural network has fewer neurons than its adjacent layers, which helps compress feature representations to fit in the available vector space. The bottleneck structure consists of three convolutional layers. The first and third convolutional layers use the unit convolution kernel and match the dimensions of the preceding and succeeding layers, respectively. The second convolution layer performs spatial convolution on the feature image that has been reduced in dimension by the first convolution layer. This reduction in dimensionality helps reduce the number of model parameters, leading to increased efficiency.

**Supplementary Table S1. Radiomics features extracted from original images**

| Category    | Features                | Category | Features                            |
|-------------|-------------------------|----------|-------------------------------------|
| First order | 10 Percentile           | GLRLM    | Gray Level NonUniformity Normalized |
|             | 90 Percentile           |          | Gray Level Variance                 |
|             | Energy                  |          | High Gray Level Run Emphasis        |
|             | Entropy                 |          | Long Run Emphasis                   |
|             | Interquartile Range     |          | Long Run High Gray Level Emphasis   |
|             | Kurtosis                |          | Long Run Low Gray Level Emphasis    |
|             | Maximum                 |          | Low Gray Level Run Emphasis         |
|             | Mean Absolute Deviation |          | Run Entropy                         |
|             | Mean                    |          | Run Length NonUniformity            |
|             | Median                  |          | Run Length NonUniformity Normalized |
|             | Minimum                 |          | Run Percentage                      |
|             | Range                   |          | Run Variance                        |
|             | Robust Mean Absolute    |          |                                     |
|             | Deviation               |          | Short Run Emphasis                  |
|             | Root Mean Squared       |          | Short Run High Gray Level Emphasis  |
|             | Skewness                |          | Short Run Low Gray Level Emphasis   |
| GLCM        | Total Energy            | GLSZM    | Gray Level NonUniformity            |
|             | Uniformity              |          | Gray Level NonUniformity Normalized |
|             | Variance                |          | Gray Level Variance                 |
|             | Autocorrelation         |          | High Gray Level Zone Emphasis       |
|             | Joint Average           |          | Large Area Emphasis                 |
|             | Cluster Prominence      |          | Large Area High Gray Level Emphasis |
|             | Cluster Shade           |          | Large Area Low Gray Level Emphasis  |
|             | Cluster Tendency        |          | Low Gray Level Zone Emphasis        |
|             | Contrast                |          | Size Zone NonUniformity             |
|             | Correlation             |          | Size Zone NonUniformity Normalized  |
|             | Difference Average      |          | Small Area Emphasis                 |

|       |                          |      |                                           |
|-------|--------------------------|------|-------------------------------------------|
|       | Difference Entropy       |      | Small Area High Gray Level Emphasis       |
|       | Difference Variance      |      | Small Area Low Gray Level Emphasis        |
|       | Joint Energy             |      | Zone Entropy                              |
|       | Joint Entropy            |      | Zone Percentage                           |
|       | Inverse Variance         |      | Zone Variance                             |
|       | Maximum Probability      |      | Dependence Entropy                        |
|       | Sum Entropy              |      | Dependence NonUniformity                  |
|       | Idn                      |      | Dependence NonUniformity Normalized       |
|       | Id                       |      | Dependence Variance                       |
|       | Idmn                     |      | Gray Level NonUniformity                  |
|       | Idm                      |      | Gray Level Variance                       |
|       | Imc2                     | GLDM | High Gray Level Emphasis                  |
|       | Imc1                     |      | Large Dependence Emphasis                 |
|       | Busyness                 |      | Large Dependence High Gray Level Emphasis |
|       | Coarseness               |      | Large Dependence Low Gray Level Emphasis  |
| NGTDM | Complexity               |      | Low Gray Level Emphasis                   |
|       | Contrast                 |      | Small Dependence Emphasis                 |
|       | Strength                 |      | Small Dependence High Gray Level Emphasis |
| GLRLM | Gray Level NonUniformity |      | Small Dependence Low Gray Level Emphasis  |

---

GLCM=Gray-level Co-occurrence Matrix; NGTDM=Neighborhood Gray Tone Difference Matrix;

GLRLM=Gray Level Run Length Matrix; GLSZM=Gray Level Size Zone Matrix; GLDM=Gray Level

Dependence Matrix.

**Supplementary material Table S2. Selected features for constructing radiomics model**

| Category    | Features                            |
|-------------|-------------------------------------|
| First order | 10 Percentile                       |
| NGTDM       | Contrast                            |
| GLDM        | Dependence Variance                 |
| GLDM        | Dependence Entropy                  |
| GLSZM       | Zone Entropy                        |
| GLSZM       | Large Area High Gray Level Emphasis |

NGTDM=Neighborhood Gray Tone Difference Matrix; GLDM=Gray Level Dependence Matrix;

GLDM=Gray Level Dependence Matrix; GLSZM=Gray Level Size Zone Matrix.
